# Supplementary material for: Bishydrazone ligand and its Zn-complex: synthesis, characterization and estimation of scalability inhibition mitigation effectiveness for API 5L X70 carbon steel in 3.5% NaCl solutions
Source: Royal Society of Chemistry journal article supplement (doi:10.1039/d4ra00404c), 2024-01-01
Supplement: d4ra00404c1.pdf [file d4ra00404c1.pdf]

**Supporting data:**

(a)

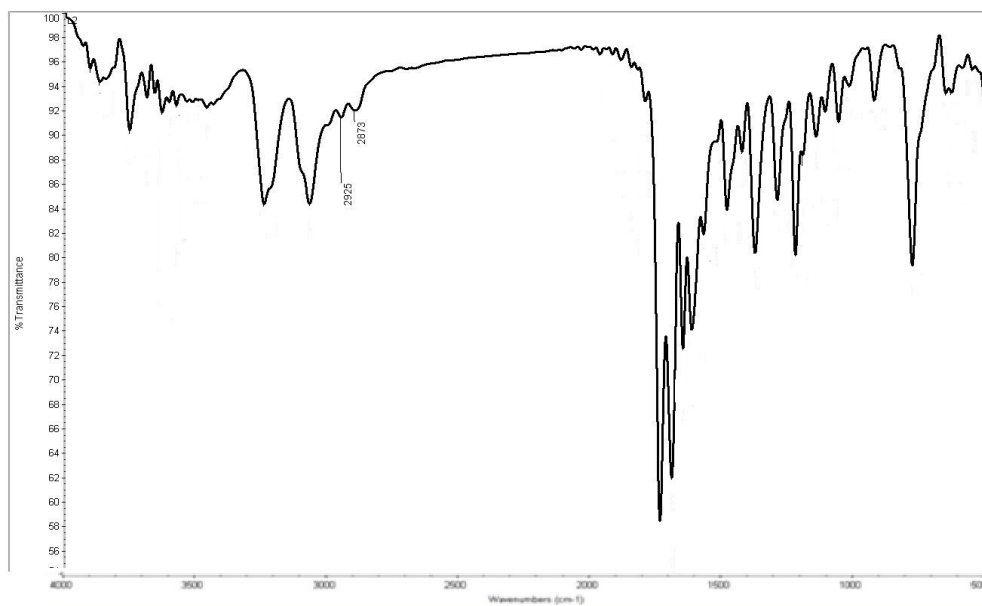

(b)

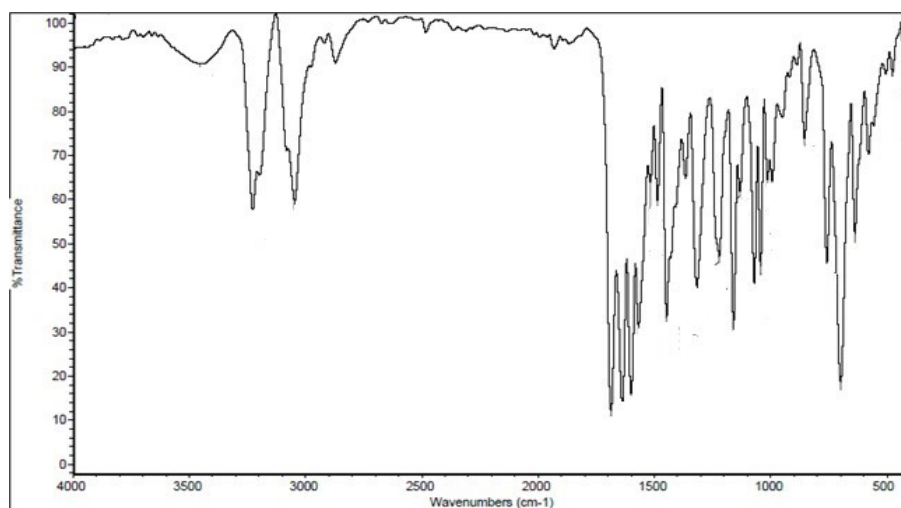

**S.1. Infrared spectra of: (a) H<sub>2</sub>TTAH;  
and (b) [Zn<sub>2</sub>(H<sub>2</sub>TTAH)(OH)<sub>4</sub>(C<sub>5</sub>H<sub>5</sub>N)<sub>3</sub>C<sub>2</sub>H<sub>5</sub>OH]**



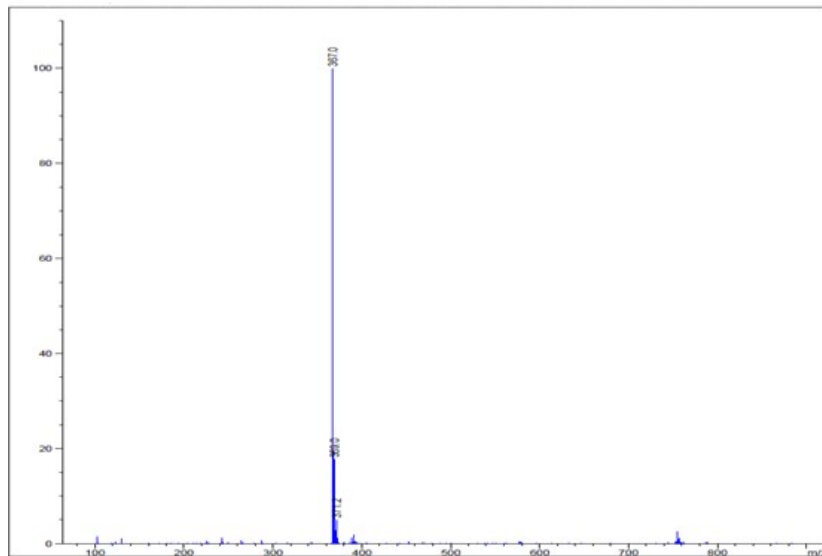

**S.3.** ESI- mass spectrum of H<sub>2</sub>TTAH

(a)

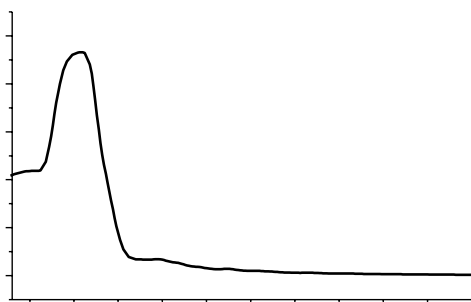

(b)

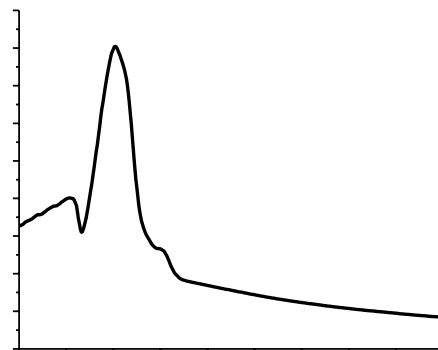

**S.4.** UV-Vis electronic spectra of (a) H<sub>2</sub>TTAH and (b) [Zn<sub>2</sub>(TTAH)(OH)<sub>2</sub>(C<sub>5</sub>H<sub>5</sub>N)<sub>2</sub>(C<sub>2</sub>H<sub>5</sub>OH)<sub>2</sub>]
